# Supplementary material for: DABCO-catalyzed Knoevenagel condensation of aldehydes with ethyl cyanoacetate using hydroxy ionic liquid as a promoter
Source: Royal Society of Chemistry journal article supplement (doi:10.1039/c8ra06506c), 2018-01-01
Supplement: c8ra06506c1.pdf [file c8ra06506c1.pdf]

Supplementary Material (ESI) for RSC Advances.

This journal is (c) The Royal Society of Chemistry 2018

## Supplementary information

### DABCO-Catalyzed Knoevenagel Condensation of Aldehydes with Ethyl Cyanoacetate Using Hydroxy Ionic Liquid as a Promoter

Dan Meng<sup>a</sup>, Yongsheng Qiao<sup>b</sup>, Xin Wang<sup>b</sup>, Wei Wen<sup>b</sup> and Sanhu Zhao<sup>\*a,b</sup>

<sup>a</sup> School Chemistry and Material Science, Shanxi Normal University, Linfen 041001, Shanxi, China

<sup>b</sup> Department of Chemistry, Xinzhou Teachers University, Xinzhou 034000, Shanxi, China

Corresponding author. e-mail: sanhuzhao@163.com

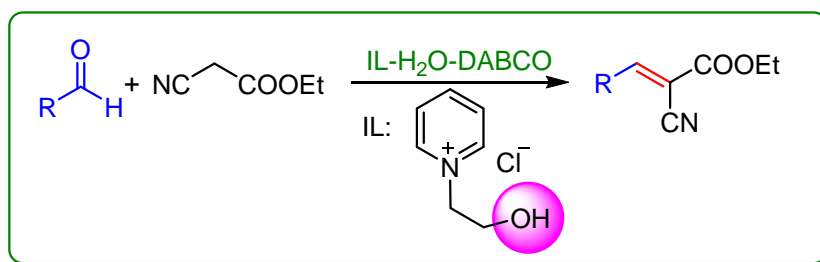

### The NMR spectra for the ionic salts and Knoevenagel condensation products

# 1. NMR spectrum of ionic salt [HyEtPy]Cl

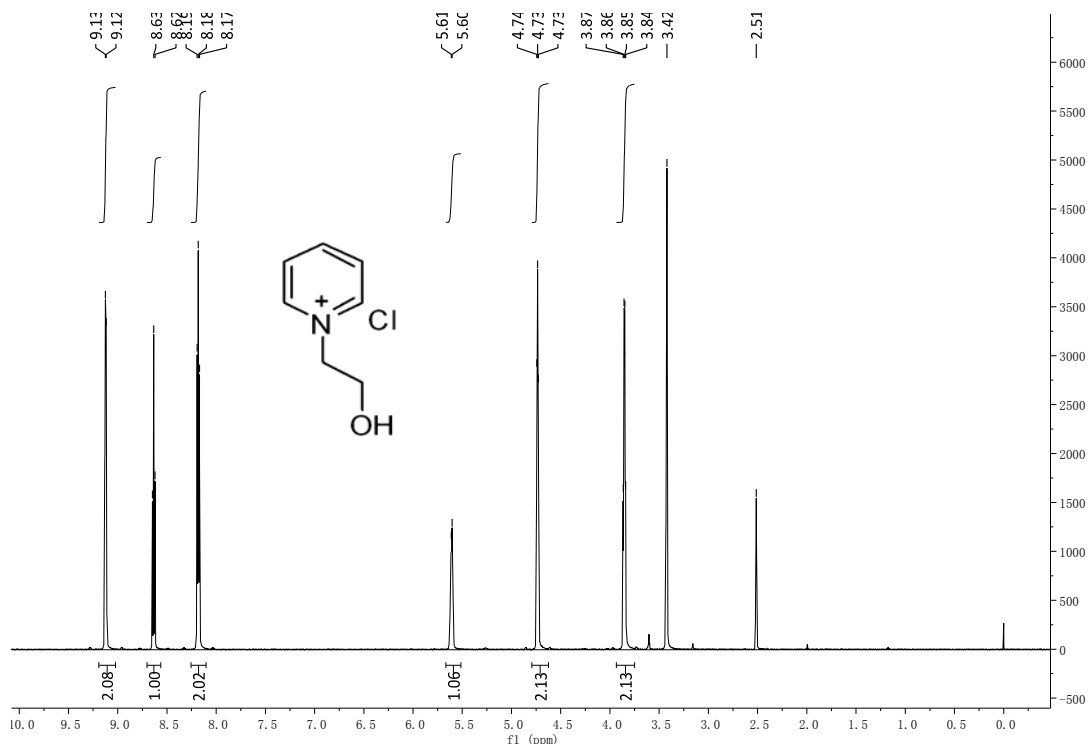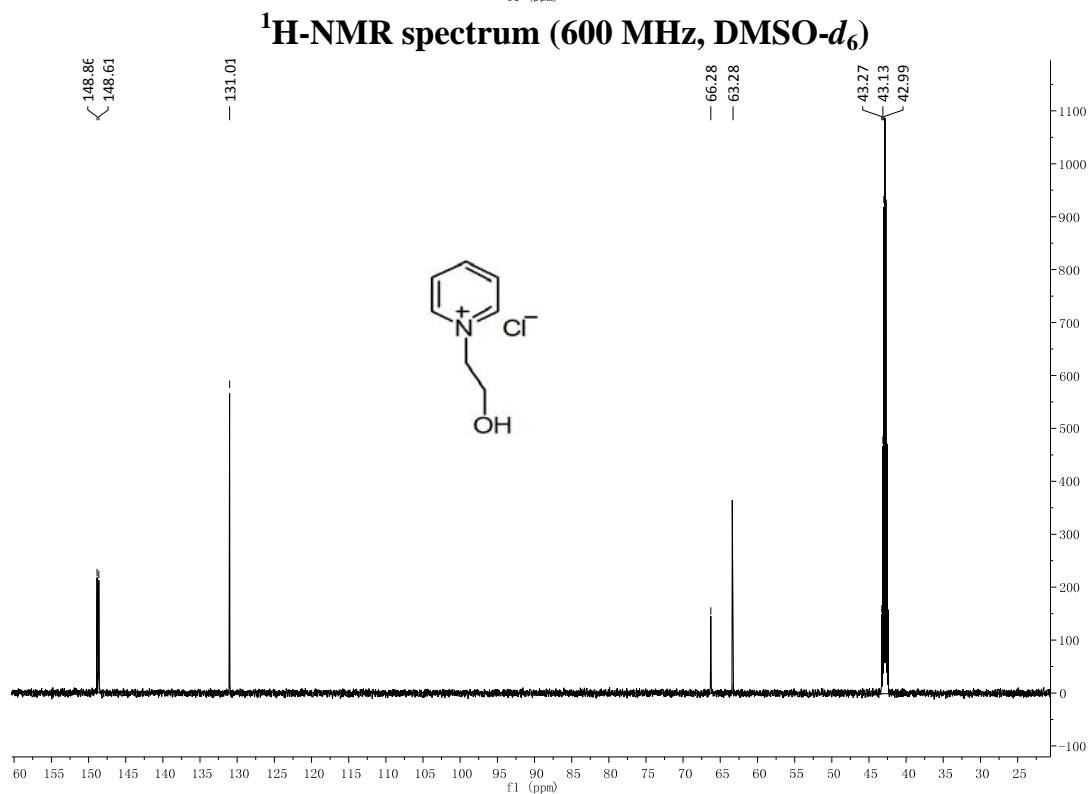

## 2. NMR spectrum of ionic salt [BuPy]Cl

ZSH 3H

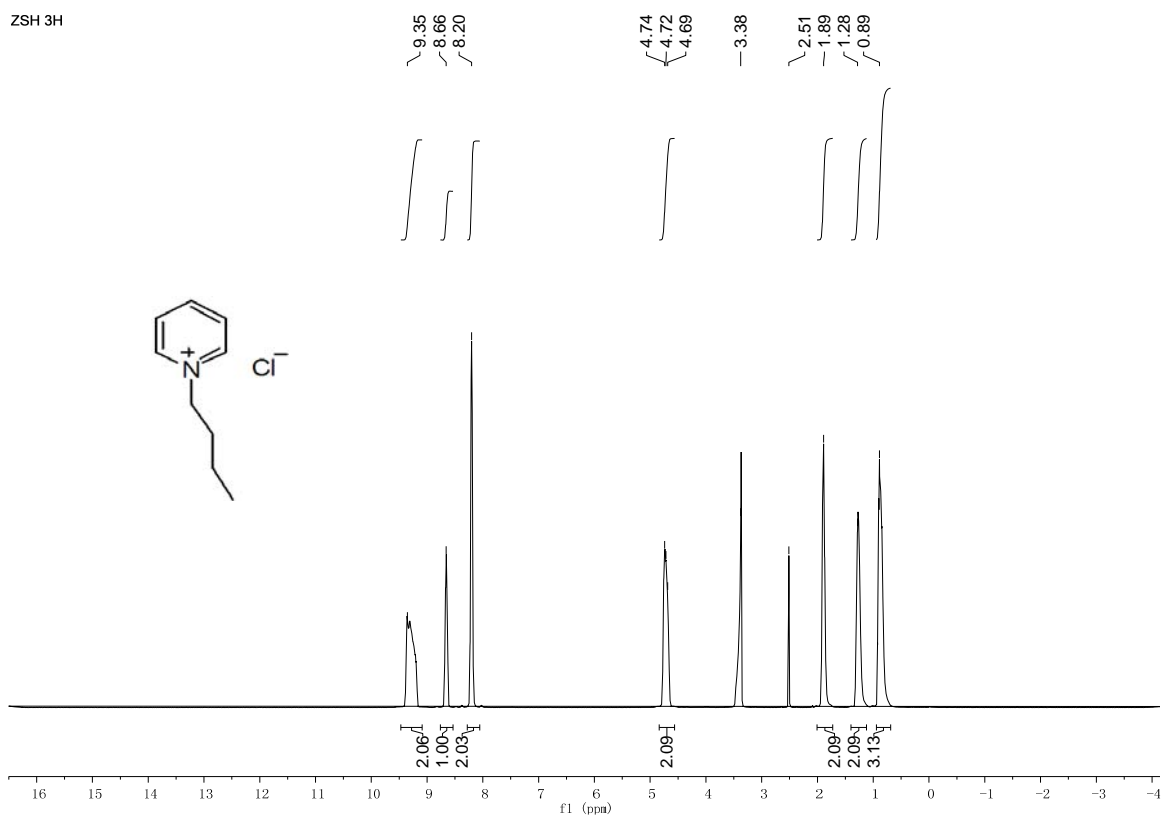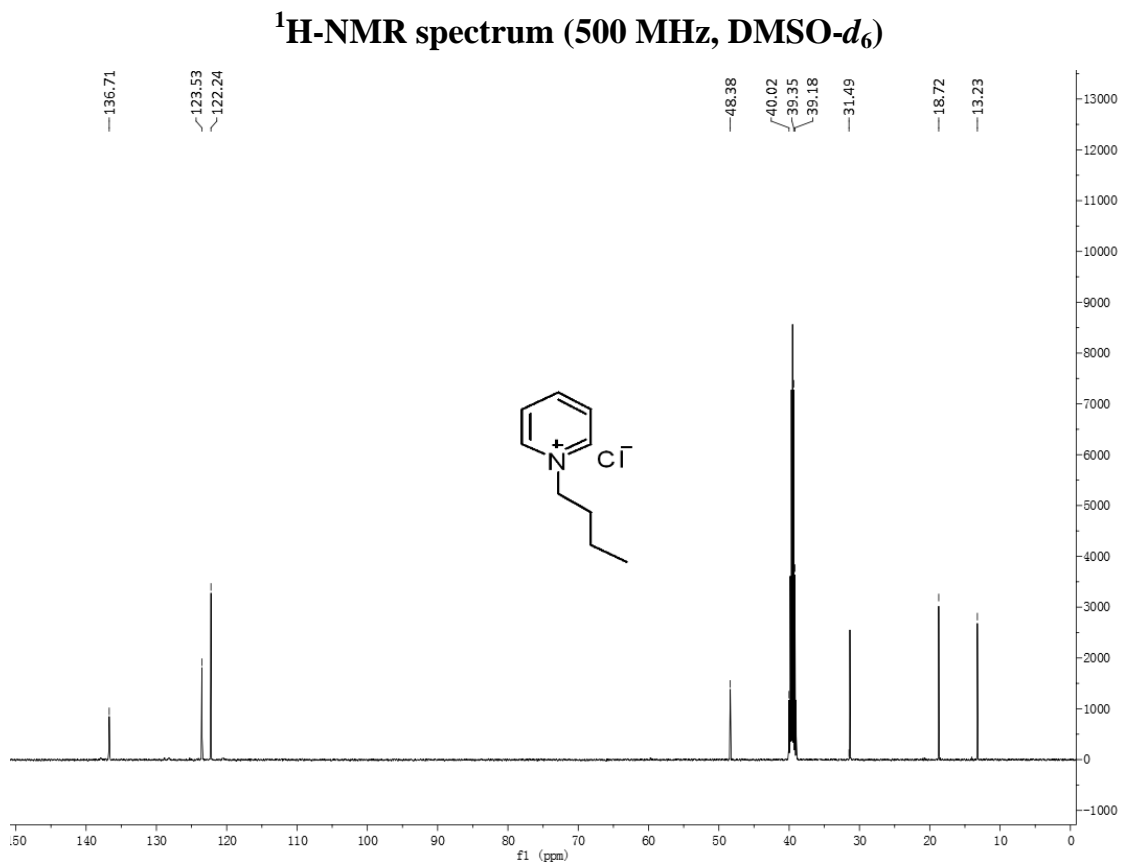

3.  $^1\text{H-NMR}$  spectrum of ethyl 2-cyano-3-phenylacrylate (Table 2, Entry 1)

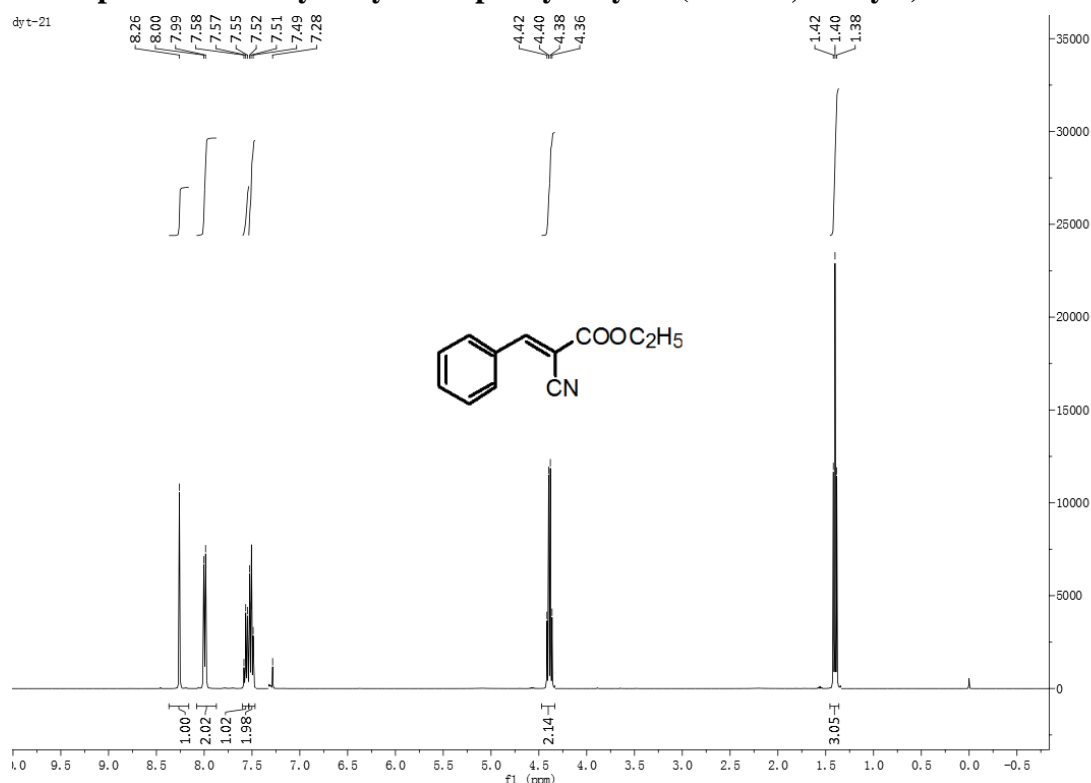

$^1\text{H NMR}$  spectrum (400 MHz,  $\text{CDCl}_3$ )

4.  $^1\text{H-NMR}$  spectrum of ethyl 2-cyano-3-(4-methoxyphenyl)acrylate (Table 2, Entry 2)

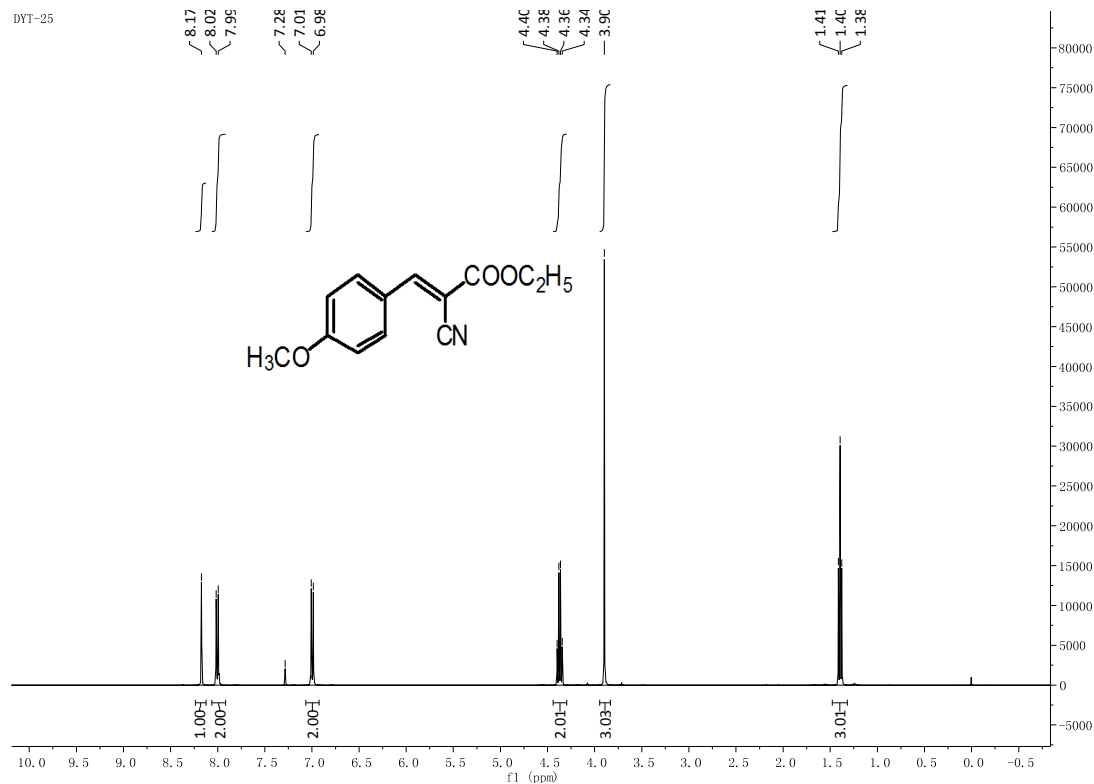

$^1\text{H NMR}$  spectrum (400 MHz,  $\text{CDCl}_3$ )

5. <sup>1</sup>H-NMR spectrum of ethyl 2-cyano-3-(4-hydroxy-3-methoxyphenyl)acrylate (Table 2, Entry 3)

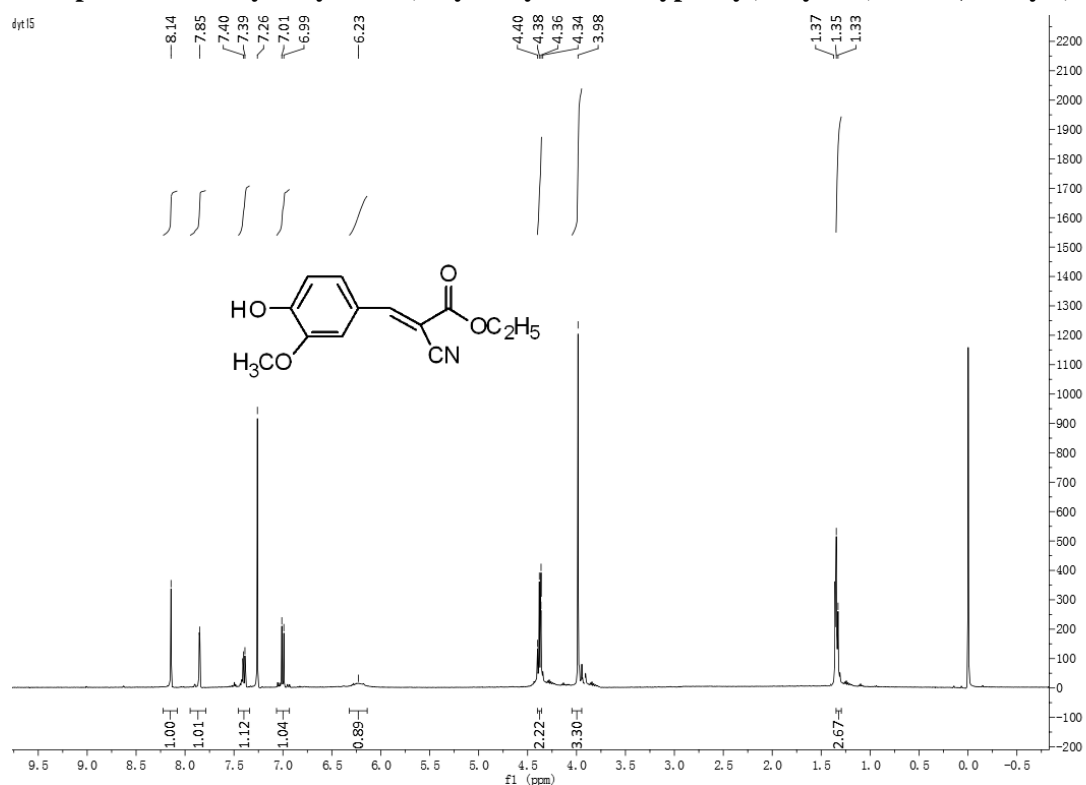

<sup>1</sup>H NMR spectrum (400 MHz, CDCl<sub>3</sub>)

6. <sup>1</sup>H-NMR spectrum of ethyl 2-cyano-3-(2,4-dimethoxyphenyl)acrylate (Table 2, Entry 4)

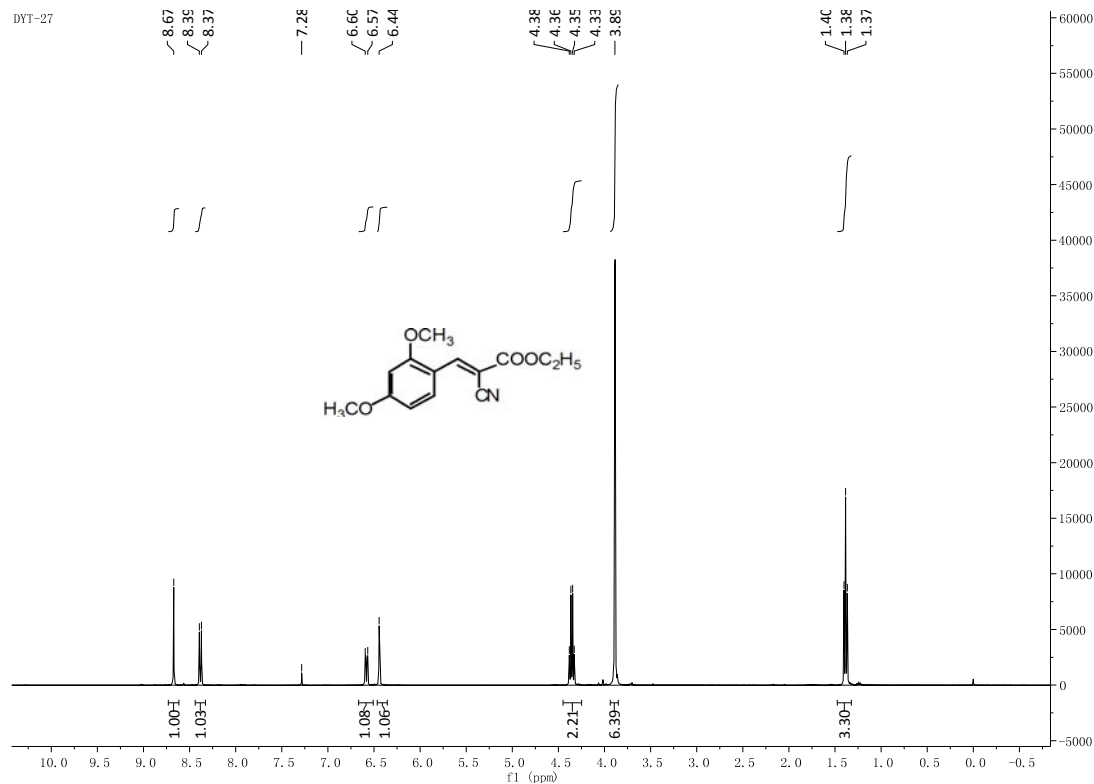

<sup>1</sup>H NMR spectrum (400 MHz, CDCl<sub>3</sub>)

7. <sup>1</sup>H-NMR spectrum of ethyl 2-cyano-3-(4-fluorophenyl)acrylate (Table 2, Entry 5)

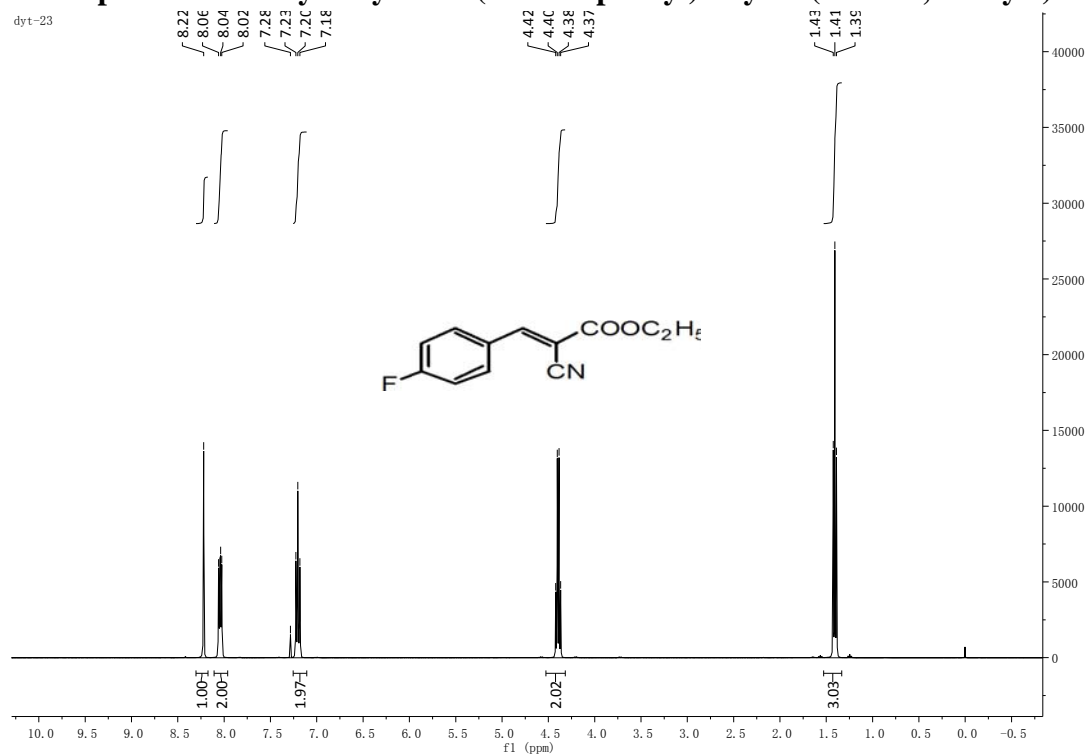

<sup>1</sup>H NMR spectrum (400 MHz, CDCl<sub>3</sub>)

8. NMR spectrum of ethyl 3-(4-chlorophenyl)-2-cyanoacrylate (Table 2, Entry 6)

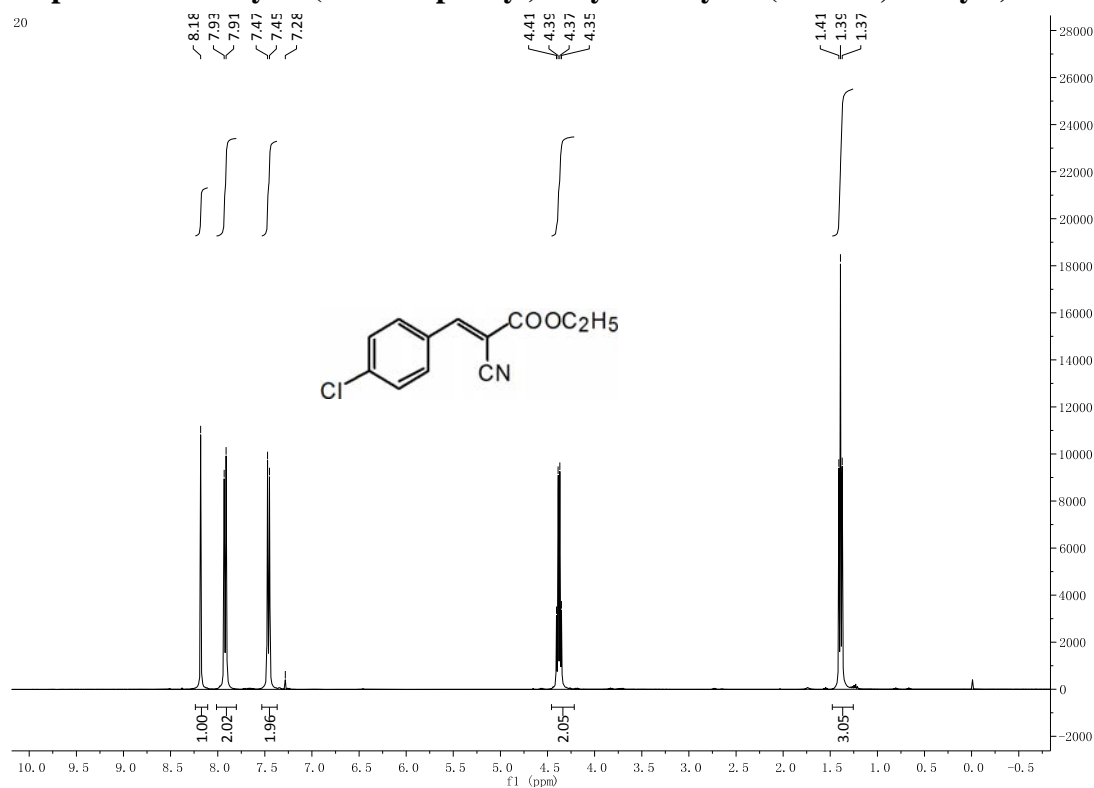

<sup>1</sup>H NMR spectrum (400 MHz, CDCl<sub>3</sub>)

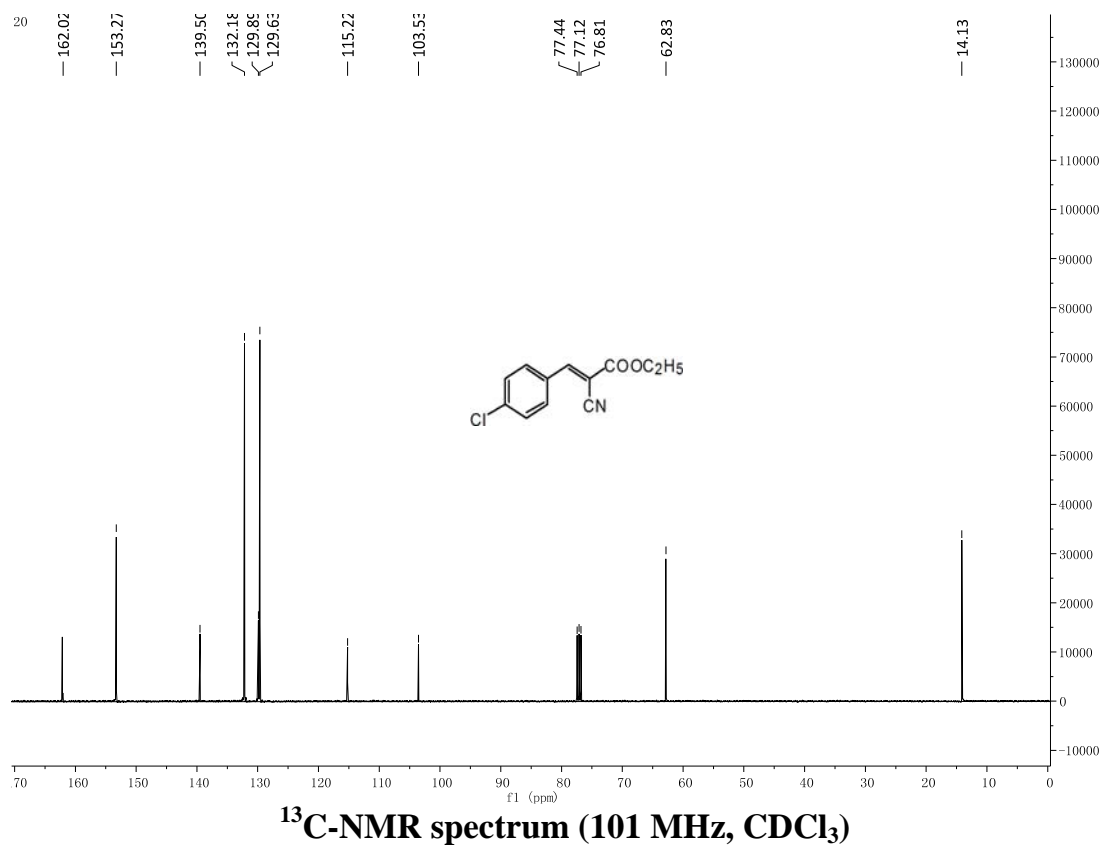

**9. <sup>1</sup>H-NMR spectrum of ethyl 2-cyano-3-(2,4-dichlorophenyl)acrylate (Table 2, Entry 7)**

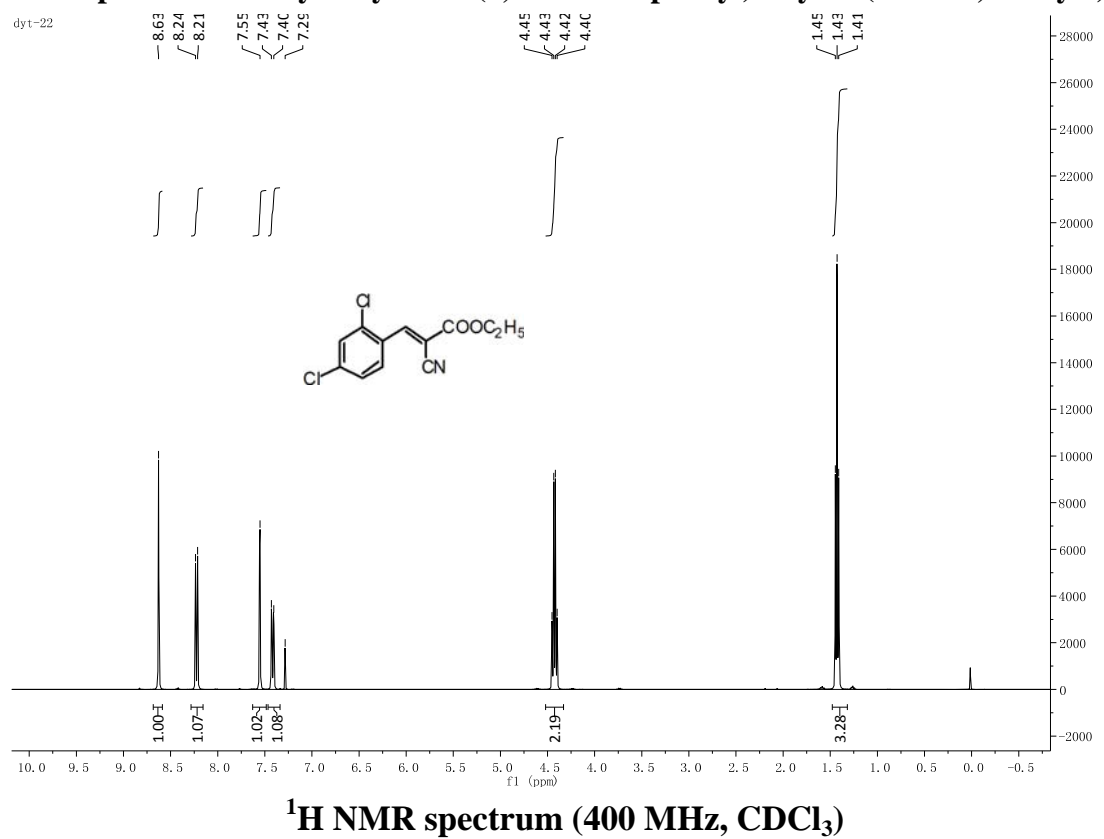

10. <sup>1</sup>H NMR spectrum of ethyl 2-cyano-3-(4-cyanophenyl)acrylate (Table 2, Entry 8)

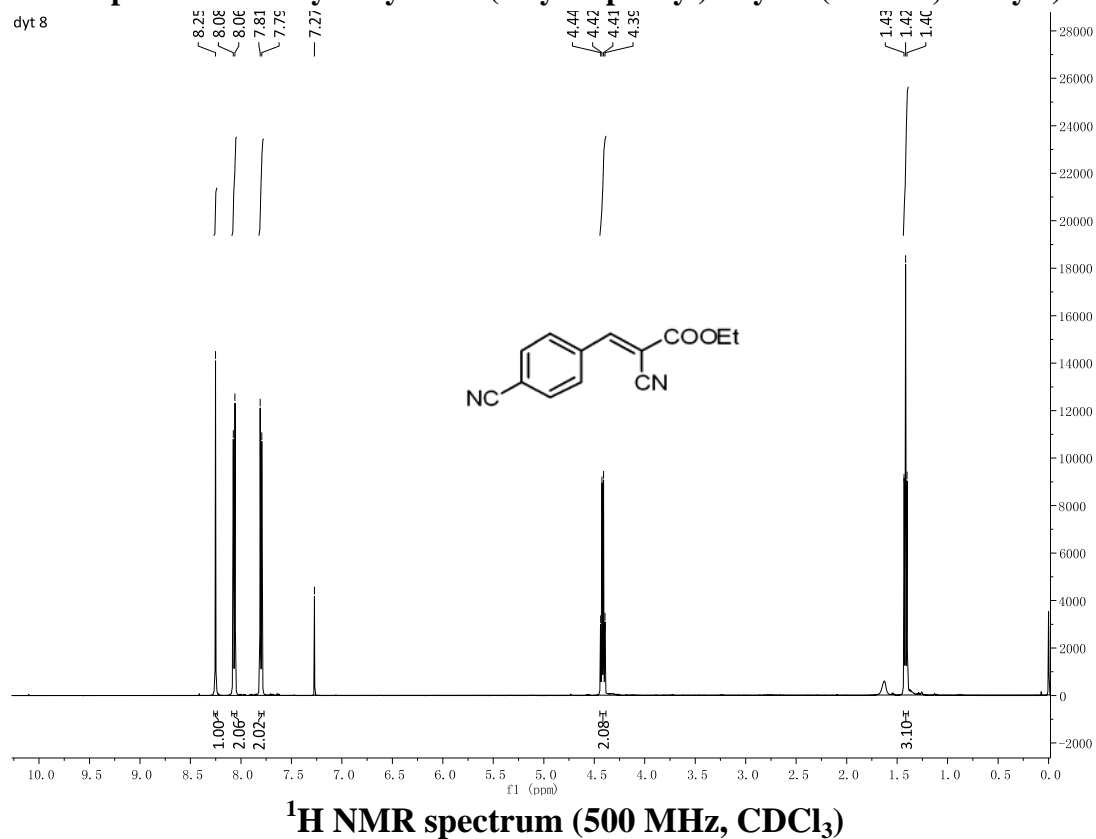

11. <sup>1</sup>H NMR spectrum of ethyl 2-cyano-3-(4-nitrophenyl)acrylate (Table 2, Entry 9)

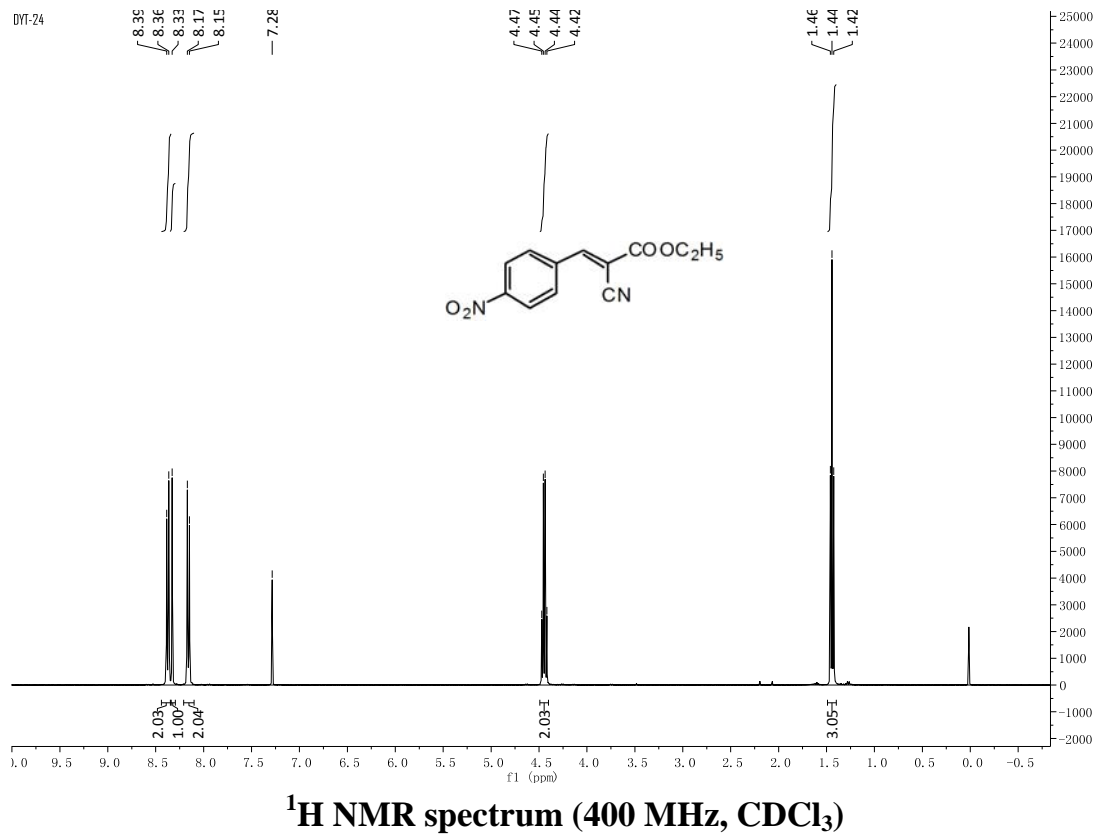



12. <sup>1</sup>H-NMR spectrum of ethyl 2-cyano-3-(3-nitrophenyl)acrylate (Table 2, Entry 10)

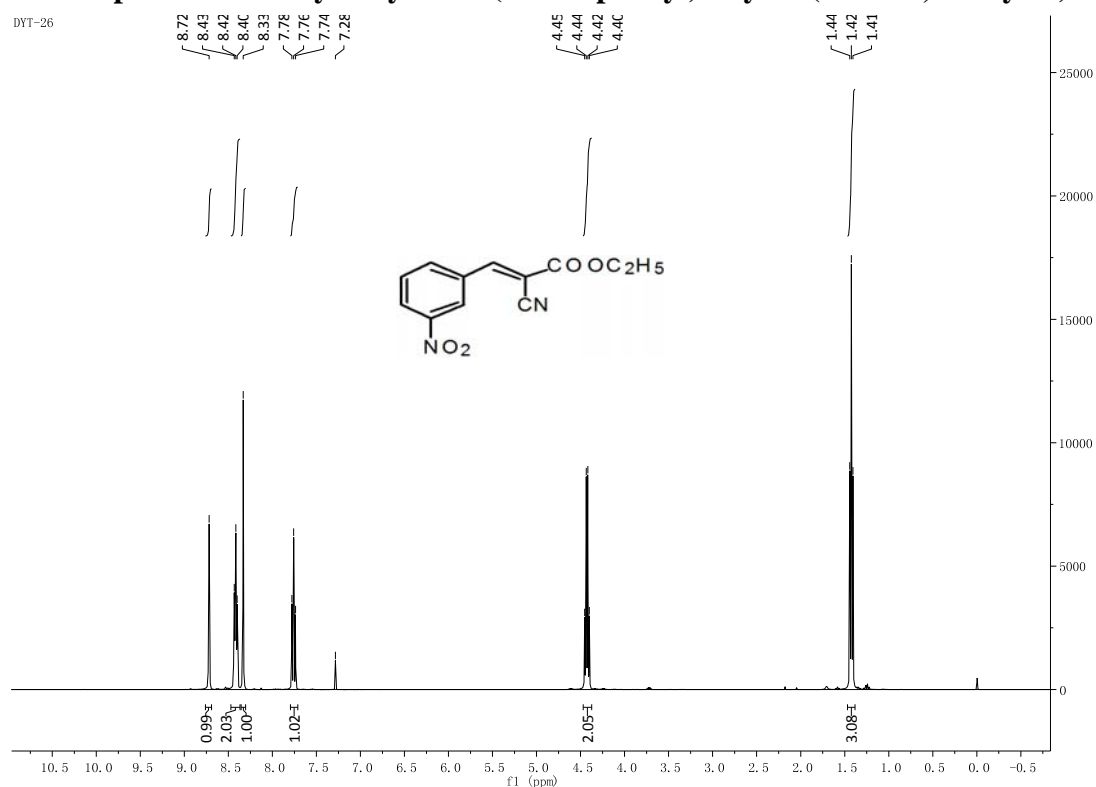

<sup>1</sup>H NMR spectrum (400 MHz, CDCl<sub>3</sub>)

13. <sup>1</sup>H-NMR spectrum of ethyl 2-cyano-3-(4-hydroxyphenyl)acrylate (Table 2, Entry 8)

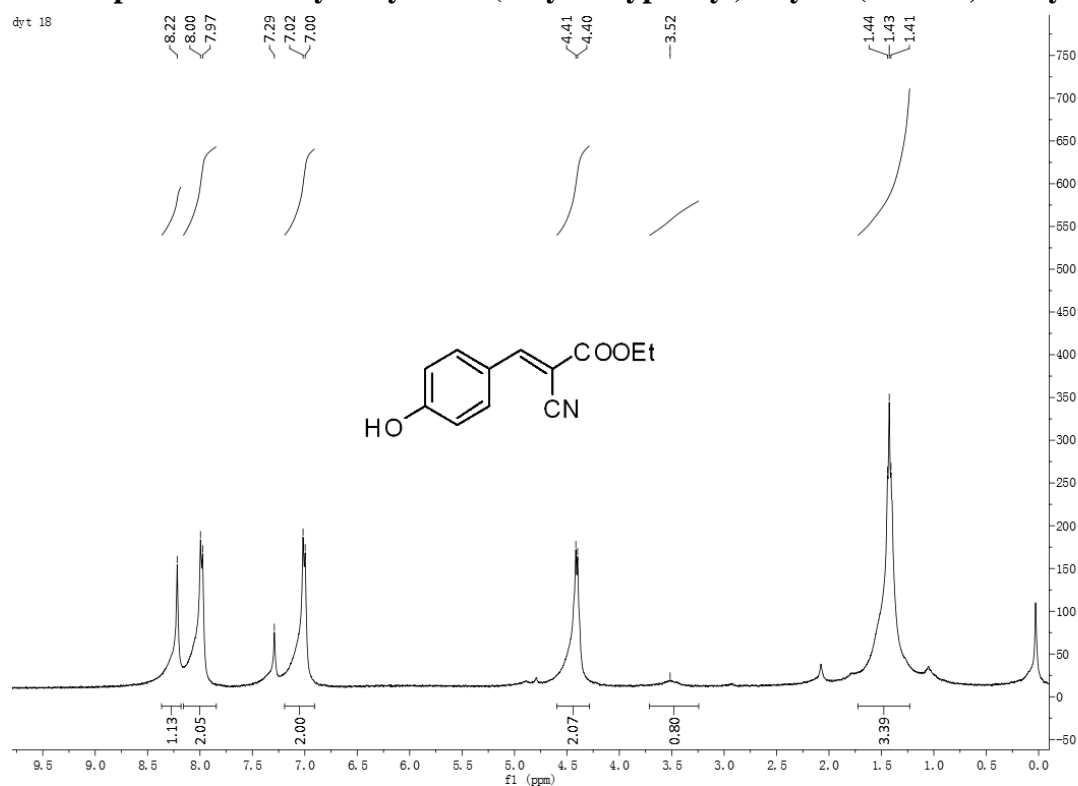

<sup>1</sup>H NMR spectrum (400 MHz, CDCl<sub>3</sub>)

14. <sup>1</sup>H-NMR spectrum of diethyl 3,3'-(1,4-phenylene) -bis(2-cyanoacrylate) (Table 2, Entry 12)

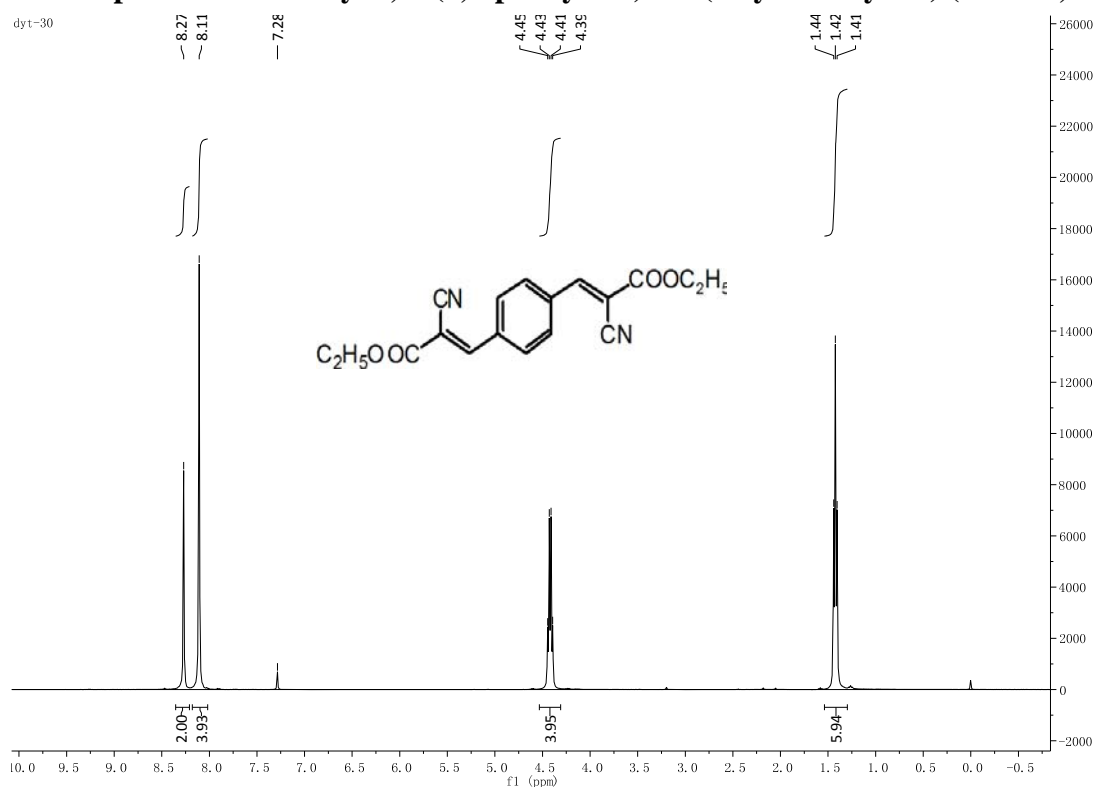

<sup>1</sup>H NMR spectrum (400 MHz, CDCl<sub>3</sub>)
